# Supplementary material for: Enhanced optical, magnetic and hydrogen evolution reaction properties of Mo1−xNixS2 nanoflakes
Source: Royal Society of Chemistry journal article supplement (doi:10.1039/c9ra01869g), 2019-01-01
Supplement: c9ra01869g1.pdf [file c9ra01869g1.pdf]

## **Supporting Information**

### **Enhanced Optical, Magnetic and Hydrogen Evolution Reaction Properties of Mo<sub>1-x</sub>Ni<sub>x</sub>S<sub>2</sub> Nanoflakes**

Levna Chacko<sup>1</sup>, Pankaj Kumar Rastogi<sup>2</sup>, T. N. Narayanan<sup>2</sup>, M. K. Jayaraj<sup>3</sup> and P. M.

Aneesh<sup>1\*</sup>

<sup>1</sup>Department of Physics, Central University of Kerala, Tejaswini Hills,

Periye, Kasaragod, Kerala, India- 671316

<sup>2</sup>Tata Institute of Fundamental Research - Hyderabad, Sy. No. 36/P Serilingampally Mandal,  
Gopanapally Village, Hyderabad - 500 107, India.

<sup>3</sup>Centre for Advanced Materials, Department of Physics, Cochin University of Science and  
Technology, Kochi, Kerala, India-682022

\* Corresponding Author E-mail: \*aneeshpm@cukerala.ac.in

**Figure S1**

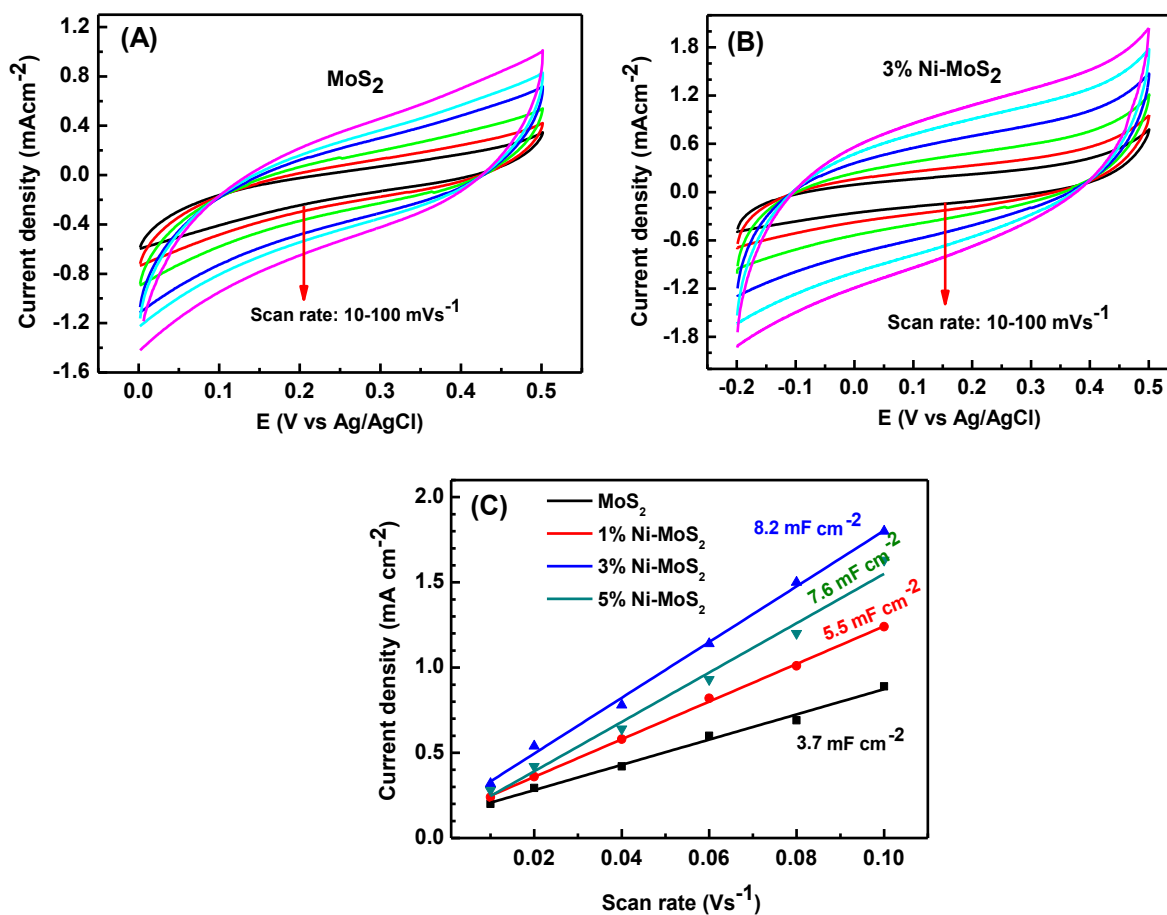

**Figure S1.** Cyclic voltammograms of (A) pristine MoS<sub>2</sub> and (B) 3% Ni-MoS<sub>2</sub> in a 0.5 M H<sub>2</sub>SO<sub>4</sub> solution at different scan rates (10-100 mVs<sup>-1</sup>). (C) Relations of difference between anodic and cathodic currents ( $\Delta J = J_a - J_c$ ) at 0.2 V with various scan rates.

The  $C_{dl}$  can be calculated from the plot (C), where the slope of the  $\Delta J$  vs. scan rate curve is  $2C_{dl}$ . The high  $C_{dl}$  value leads to larger electrochemical surface area and more active sites for better HER performance.

**Figure S2**

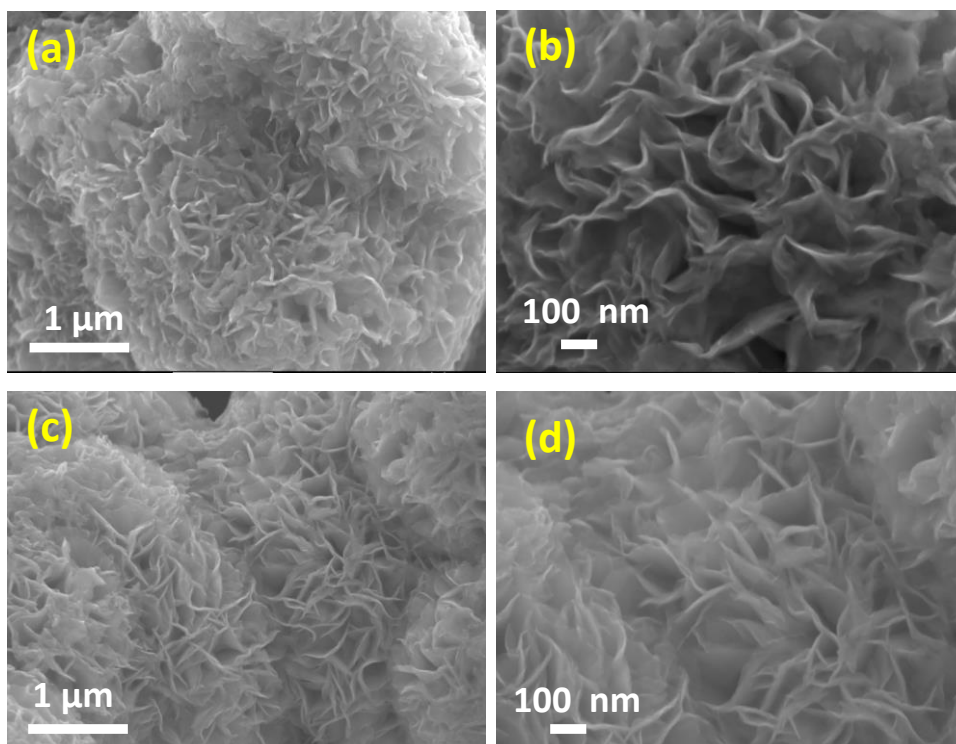

**Figure S2.** Low (a,c) and high (b,d) magnification SEM images of 3% Ni-MoS<sub>2</sub> film on GC before (a, b) and after (c, d) the durability measurements.

**Figure S3**

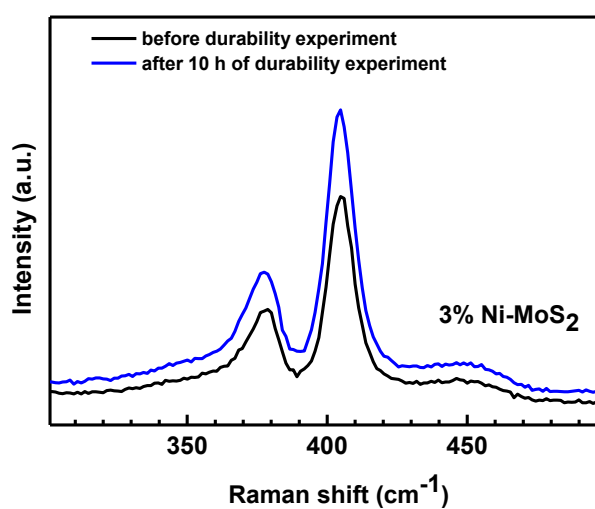

**Figure S3.** Raman spectra of 3% Ni-MoS<sub>2</sub> film on GC before and after the durability measurements.

**Figure S4**

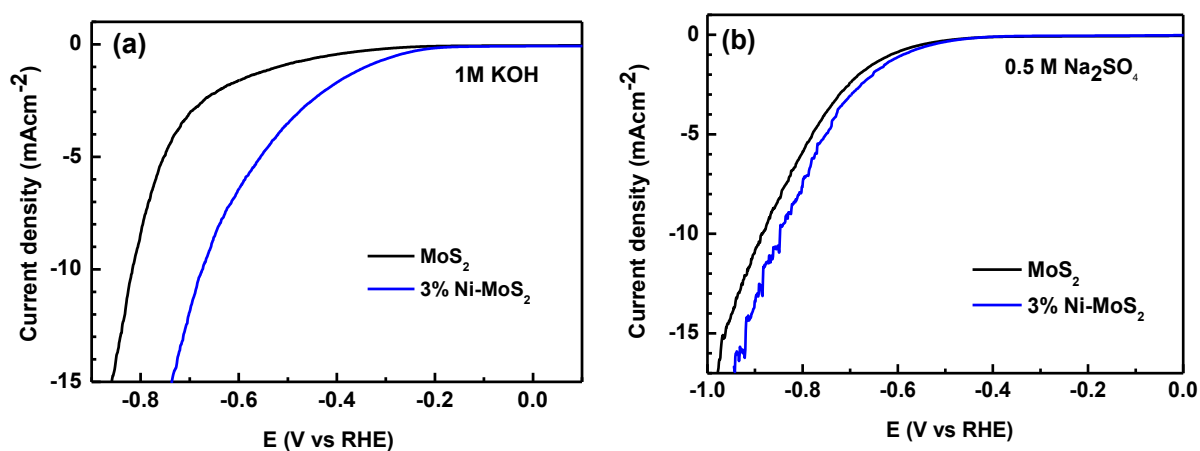

**Figure S4.** LSVs of MoS<sub>2</sub> and 3% Ni-MoS<sub>2</sub> modified electrodes in (a) alkaline (1 M KOH) and in (b) neutral (0.5 M Na<sub>2</sub>SO<sub>4</sub>) electrolytes at 2 mV s<sup>-1</sup> scan rate.

**Figure S5**

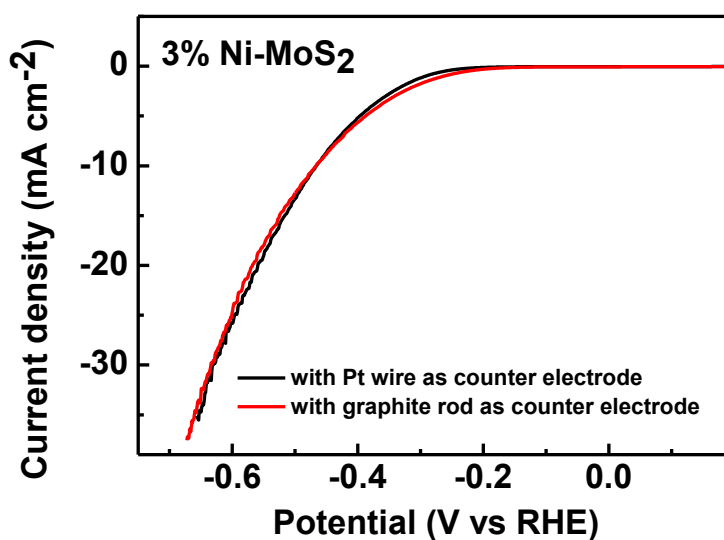

**Figure S5.** Polarization curves showing the comparison of the 3% Ni-MoS<sub>2</sub> electrode with Pt wire (black) and graphite rod (red) as counter electrodes.

**Table S1.** Summary of the valuable parameters of the MoS<sub>2</sub> and various Mo<sub>1-x</sub>Ni<sub>x</sub>S<sub>2</sub> electrocatalysts in acidic medium.

| <b>Samples</b>         | <b>Overpotential<br/>(at 1 mAcm<sup>-2</sup>)<br/>(mV)</b> | <b>R<sub>ct</sub><br/>(KΩ)</b> | <b>Tafel slope<br/>(mV/decade)</b> | <b>Exchange<br/>current<br/>density<br/>(J<sub>0</sub>)<br/>(mAcm<sup>-2</sup>)</b> | <b>C<sub>dl</sub><br/>(mFcm<sup>-2</sup>)</b> |
|------------------------|------------------------------------------------------------|--------------------------------|------------------------------------|-------------------------------------------------------------------------------------|-----------------------------------------------|
| MoS <sub>2</sub>       | 418                                                        | 3.402                          | 162                                | 2.2 x 10 <sup>-3</sup>                                                              | 3.7                                           |
| 1% Ni-MoS <sub>2</sub> | 392                                                        | 2.519                          | 146                                | 3.2 x 10 <sup>-3</sup>                                                              | 5.5                                           |
| 3% Ni-MoS <sub>2</sub> | 297                                                        | 0.730                          | 94                                 | 8.5 x 10 <sup>-3</sup>                                                              | 8.2                                           |
| 5% Ni-MoS <sub>2</sub> | 370                                                        | 1.400                          | 130                                | 4.6 x 10 <sup>-3</sup>                                                              | 7.6                                           |
